# Supplementary material for: Small molecules enhance the potency of natural antimicrobial peptides
Source: PubMed Central journal article supplement (PMC8822605; doi:10.1016/j.bpj.2021.12.029), 2021-12-24
Supplement: mmc1.pdf [file mmc1.pdf]

**Biophysical Journal, Volume 121**

**Supplemental information**

**Small molecules enhance the potency of natural antimicrobial peptides**

**Valeria Losasso, Khushbu Agarwal, Morris Waskar, Amitabha Majumdar, Jason Crain, Martyn Winn, and Michael Hoptroff**

## Supporting information

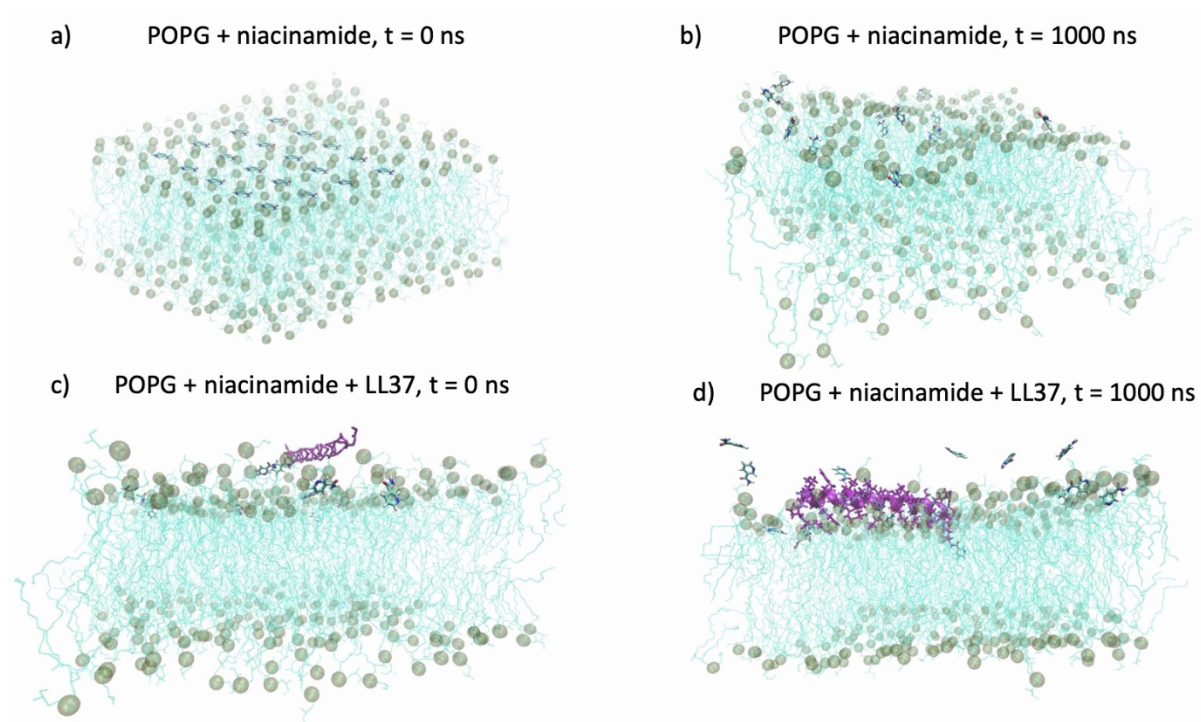

Fig. S1. a) Simulation setup for a membrane system (POPG as an example) with 20 additives in a grid (niacinamide as an example). b) Snapshot of the first POPG + niacinamide simulation at t = 1000 ns. c) Addition of LL-37 peptide onto the system. d) Snapshot of the first POPG + LL-37 + niacinamide simulation at t = 1000 ns.

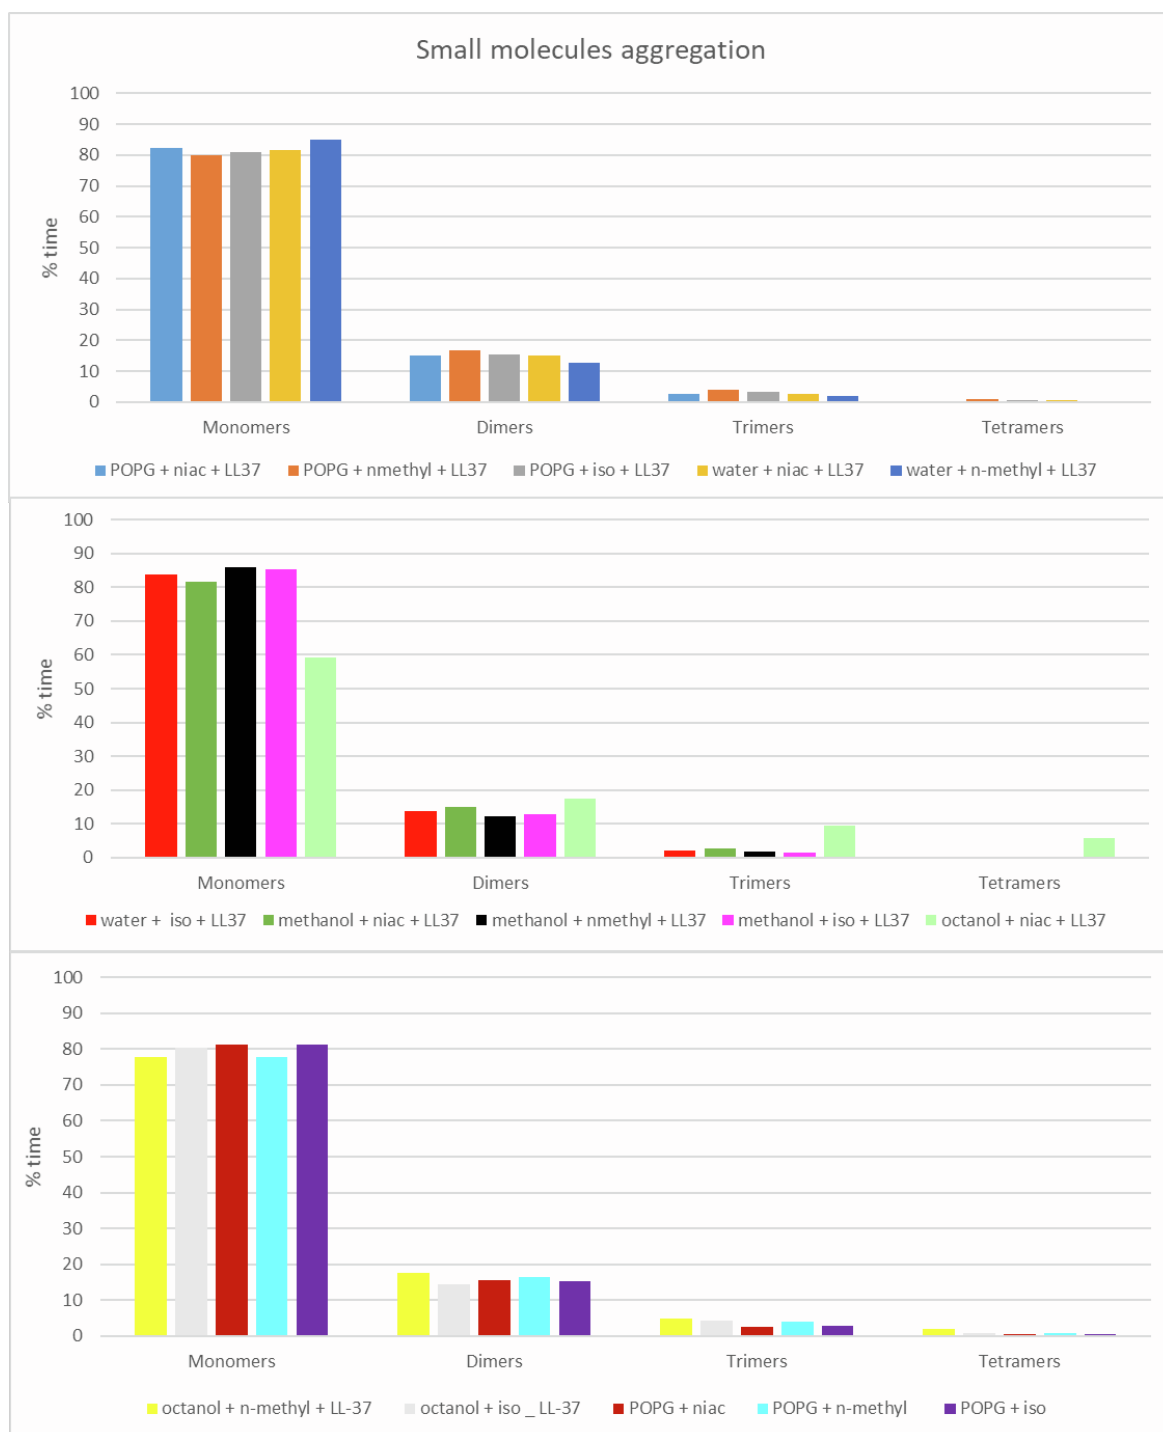

Fig. S2. Percentage over simulation time of aggregates in different sizes for the three additives in membrane, water, methanol and octanol. In every group, at least 1 molecule is located  $< 5$  Å away from any of the others.

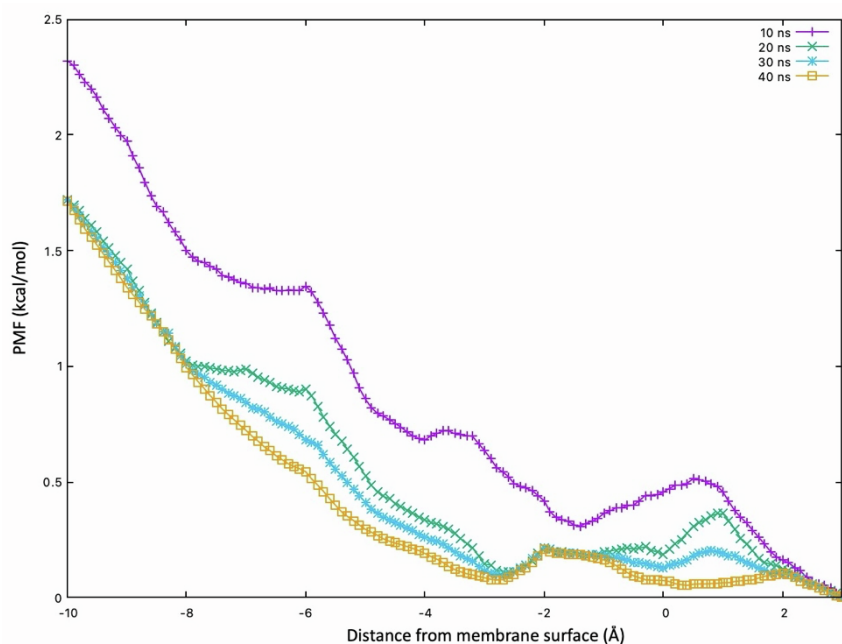

Fig. S3. PMF profile calculated after 10, 20, 30 and 40 ns for POPG + niacinamide.

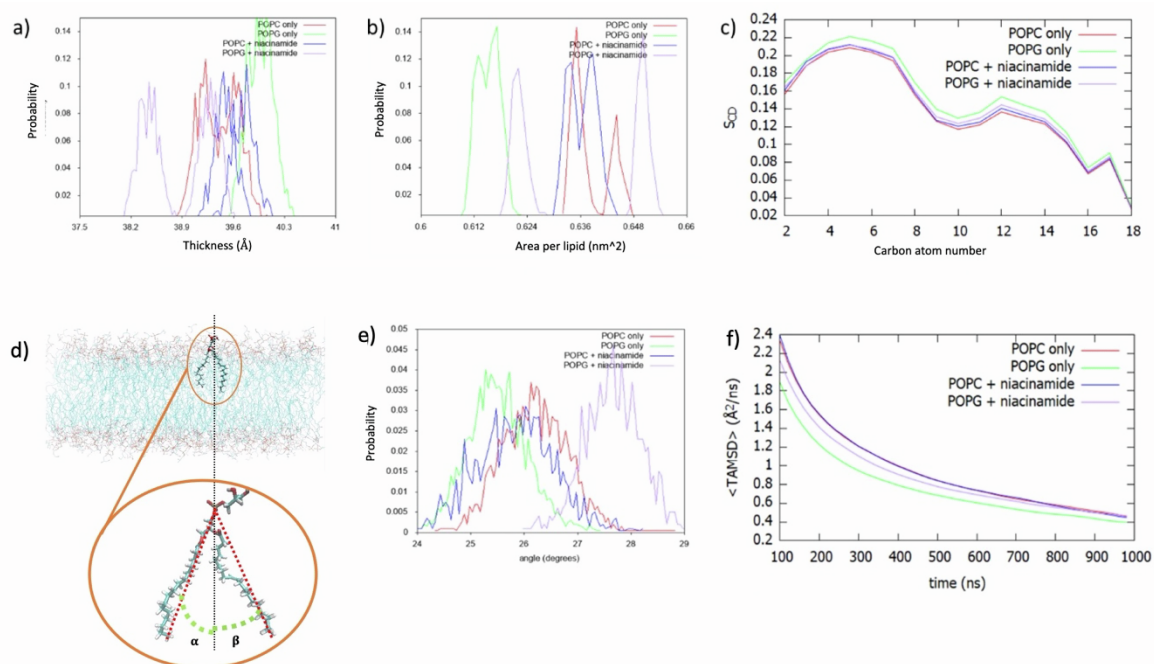

Fig. S4. Analysis of unbiased simulations for niacinamide in complex with POPC or POPG membranes. a) Distribution of thickness values; b) Distribution of area per lipid values; c)  $S_{CD}$  order parameter; d) Definition of tilt angle as the average of  $\alpha$  and  $\beta$  angles, formed between the membrane normal at  $t = 0$  and the line connecting the lipid phosphate to the terminal carbon atom of each tail; e) Distribution of lipid tilt angles; f) Ensemble averaged time-averaged mean square displacement (TAMSD).

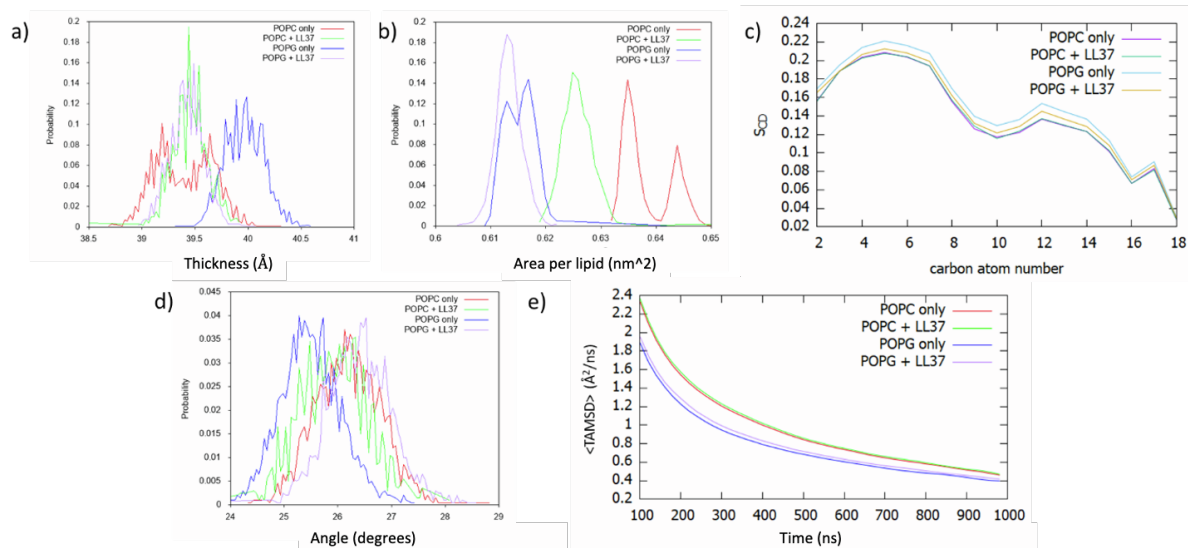

Fig. S5. Analysis of LL-37 in complex with POPC and POPG membranes compared with membrane-only systems. a) Distribution of thickness values; b) Distribution of area per lipid values; c)  $S_{CD}$  order parameter; d) Distribution of lipid tilt angles; e) Ensemble averaged time-averaged mean square displacement (TAMSD).

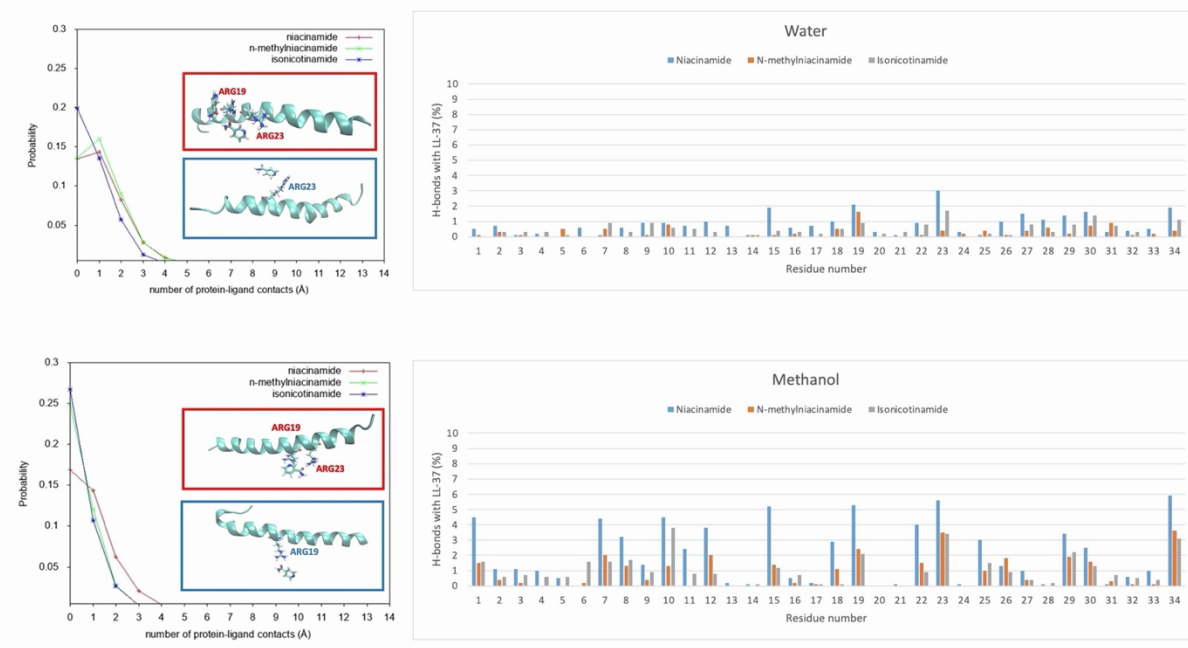

Fig. S6. Distribution of contacts for niacinamide and its derivatives with LL-37 in membrane (top) and octanol (bottom). Representative snapshots for niacinamide and isonicotinamide binding are shown in red and blue boxes, respectively.

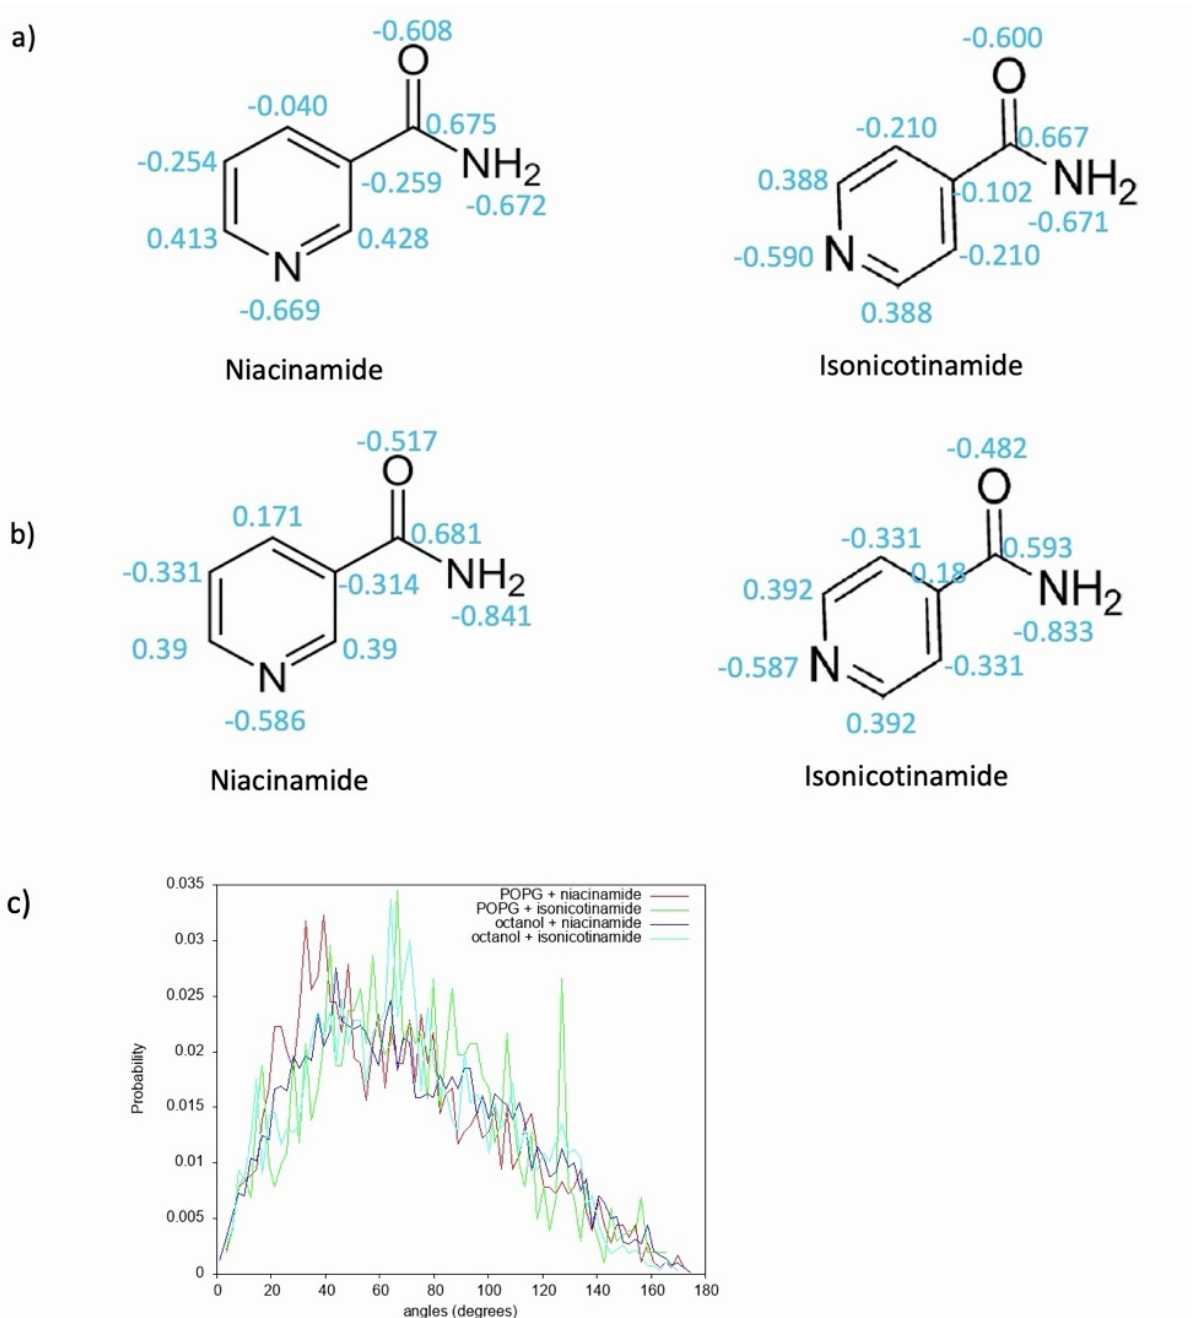

Fig. S7. a) Different charge distribution between niacinamide and isonicotinamide as calculated by Antechamber. b) Partial charges on the two molecules as calculated by restrained electrostatic potential (ESP)-based charge fitting. c) Distribution of angles between LL-37 main axis and niacinamide/isonicotinamide main axis when the two molecules are less than 5 Å apart.

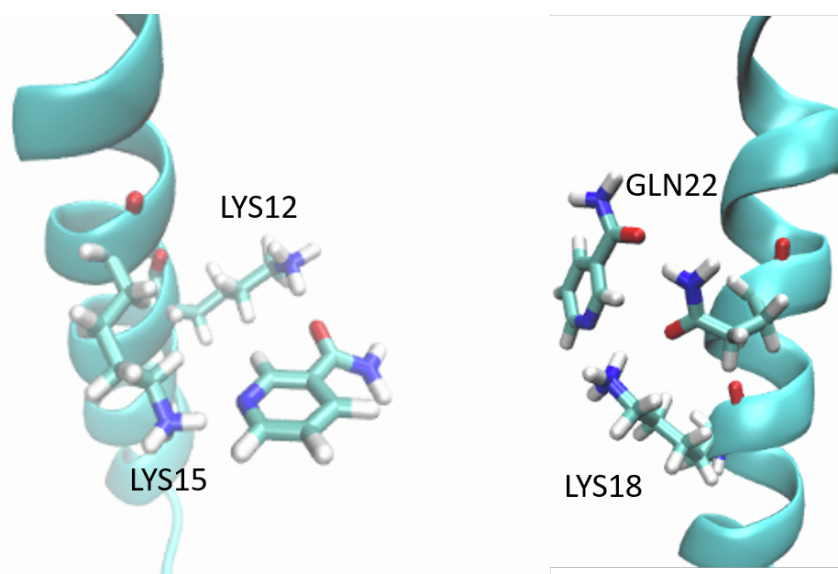

Fig. S8. Simultaneous hydrogen bonds between niacinamide and LL-37 residue pairs.

Table S1. Antimicrobial activity of niacinamide and analogues with LL37 on *S.aureus*

| SET 1                    | Log counts (cfu/mL) |         |         |
|--------------------------|---------------------|---------|---------|
|                          | R1                  | R2      | Average |
| Culture Control          | 1130000             | 1220000 | 1175000 |
| 3% NIA                   | 1120000             | 1590000 | 1355000 |
| 3% MeNAM                 | 1270000             | 1440000 | 1355000 |
| 3% ISON                  | 1350000             | 1090000 | 1220000 |
| LL37 (2 µg/mL)           | 80800               | 67200   | 74000   |
| 3% NIA + LL37(2 µg/mL)   | 6100                | 5100    | 5600    |
| 3% MeNAM + LL37(2 µg/mL) | 14800               | 11300   | 13050   |
| 3% ISON + LL37(2 µg/mL)  | 57600               | 41200   | 49400   |

| SET 2                    | Log counts (cfu/mL) |         |         |
|--------------------------|---------------------|---------|---------|
|                          | R1                  | R2      | Average |
| Culture Control          | 2480000             | 2320000 | 2400000 |
| 3% NIA                   | 2400000             | 2480000 | 2440000 |
| 3% MeNAM                 | 2560000             | 2480000 | 2520000 |
| 3% ISON                  | 2160000             | 2400000 | 2280000 |
| LL37 (2 µg/mL)           | 22400               | 19600   | 21000   |
| 3% NIA + LL37(2 µg/mL)   | 1300                | 1000    | 1150    |
| 3% MeNAM + LL37(2 µg/mL) | 2300                | 1500    | 1900    |
| 3% ISON + LL37(2 µg/mL)  | 4500                | 5300    | 4900    |

Key: NIA= Niacinamide, MeNAM= N-methylnicotinamide, ISON= Isonicotinamide,  
 LL37=Cathelicidin Antimicrobial peptide (AMP)  
 All % values as w/v  
 R1 and R2 are technical replicates

Table S2. Hydrogen bonds between niacinamide, n-methylnicotinamide and nicotinamide and LL-37 in four different environments (POPG membrane, water, methanol, octanol).

|                             | Ring N                                                                                                                                                                                    | Amide N                                                                                                                                                                                                                                                                                                                                                                                                                               | Amide O                                                                                                                                                                                                                                                                                                                                        |
|-----------------------------|-------------------------------------------------------------------------------------------------------------------------------------------------------------------------------------------|---------------------------------------------------------------------------------------------------------------------------------------------------------------------------------------------------------------------------------------------------------------------------------------------------------------------------------------------------------------------------------------------------------------------------------------|------------------------------------------------------------------------------------------------------------------------------------------------------------------------------------------------------------------------------------------------------------------------------------------------------------------------------------------------|
| POPG + niacinamide          | Leu2 0.3%<br>Phe5 0.2%<br>Ser9 0.6%<br>Arg7 0.4%<br>Lys8 0.2%<br>Lys10 0.3%<br>Lys15 0.2%<br>Lys18 2.2%<br>Lys25 0.6%<br>Arg23 0.6%<br>Gln22 1%<br>Arg29 0.4%<br>Asn30 0.4%<br>Arg34 0.3% | Leu1 0.4%<br>Leu2 0.7%<br>Gly3 0.2%<br>Asp4 0.4%<br>Phe6 0.2%<br>Arg7 0.5%<br>Ser9 0.4%<br>Lys10 0.2%<br>Glu11 0.6%<br>Lys12 0.1%<br>Ile13 0.2%<br>Gly14 0.2%<br>Lys15 0.3%<br>Glu16 0.3%<br>Lys18 0.3%<br>Arg19 0.6%<br>Ile20 0.3%<br>Val21 0.1%<br>Gln22 2.6%<br>Arg23 0.7%<br>Ile24 0.1%<br>Lys25 0.3%<br>Asp26 1%<br>Phe27 0.2%<br>Leu28 0.2%<br>Arg29 0.4%<br>Asn30 0.6%<br>Leu31 0.3%<br>Val32 0.2%<br>Pro33 0.7%<br>Arg34 0.4% | Leu1 0.9%<br>Leu2 0.3%<br>Gly3 0.9%<br>Asp4 0.1%<br>Phe6 0.1%<br>Arg7 0.4%<br>Lys8 0.4%<br>Ser9 0.1%<br>Lys10 1%<br>Glu11 0.3%<br>Lys12 0.3%<br>Lys15 0.5%<br>Glu16 0.1%<br>Lys18 0.8%<br>Arg19 1%<br>Val21 0.2%<br>Gln22 2.1%<br>Arg23 0.5%<br>Ile24 0.1%<br>Lys25 0.9%<br>Asp26 0.2%<br>Phe27 0.1%<br>Arg29 0.6%<br>Asn30 0.7%<br>Arg34 0.6% |
| POPG + n-methylnicotinamide | Leu1 0.1%<br>Leu2 0.1%<br>Gly3 0.1%<br>Arg7 0.1%<br>Lys8 0.2%<br>Ser9 0.5%<br>Lys10 0.3%<br>Lys12 0.3%<br>Lys18 0.1%<br>Arg19 1.2%<br>Arg23 0.5%<br>Ile24 0.1%                            | Leu1 0.3%<br>Leu2 0.2%<br>Phe5 0.4%<br>Lys8 0.1%<br>Ser9 1.2%<br>Lys10 0.2%<br>Glu11 0.2%<br>Lys12 1%<br>Ile13 1%<br>Glu16 0.9%<br>Phe17 1%<br>Gln22 0.1%                                                                                                                                                                                                                                                                             | Leu1 0.2%<br>Leu2 0.3%<br>Gly3 0.2%<br>Phe5 0.1%<br>Phe6 0.1%<br>Lys8 0.1%<br>Ser9 1.4%<br>Lys10 0.9%<br>Lys12 0.9%<br>Ile13 0.3%<br>Lys15 0.1%<br>Lys18 0.3%                                                                                                                                                                                  |



|                           |                                                                                                                                                                    |                                                                                                                                                                                                                                                                                                                                                                                                              |                                                                                                                                                                                                                                                                               |
|---------------------------|--------------------------------------------------------------------------------------------------------------------------------------------------------------------|--------------------------------------------------------------------------------------------------------------------------------------------------------------------------------------------------------------------------------------------------------------------------------------------------------------------------------------------------------------------------------------------------------------|-------------------------------------------------------------------------------------------------------------------------------------------------------------------------------------------------------------------------------------------------------------------------------|
|                           | Lys25 0.3%<br>Arg29 0.1%<br>Asn30 0.9%<br>Arg34 0.4%                                                                                                               | Arg23 1.1%<br>Asp26 0.6%<br>Phe27 0.3%<br>Arg29 0.2%<br>Asn30 1.9%<br>Leu31 0.7%<br>Pro33 0.2%<br>Arg34 0.1%                                                                                                                                                                                                                                                                                                 | Arg19 1%<br>Ile20 0.3%<br>Val21 0.1%<br>Gln22 0.5%<br>Arg23 2.6%<br>Ile24 0.3%<br>Lys25 3.8%<br>Phe27 0.2%<br>Leu28 0.4%<br>Arg29 1.4%<br>Asn30 1.1%<br>Leu31 0.2%<br>Val32 0.1%<br>Arg34 2%                                                                                  |
| POPG +<br>isonicotinamide | Arg7 0.1%<br>Ser9 0.2%<br>Lys10 0.1%<br>Lys12 0.1%<br>Lys15 0.1%<br>Arg19 0.2%<br>Gln22 0.2%<br>Arg23 0.1%<br>Lys25 0.6%<br>Arg29 0.2%<br>Asn30 0.3%<br>Arg34 1.3% | Leu1 0.1%<br>Gly3 0.1%<br>Phe5 0.1%<br>Phe6 0.1%<br>Arg7 0.3%<br>Ser9 0.4%<br>Lys10 0.2%<br>Glu11 0.2%<br>Lys12 0.5%<br>Ile13 0.1%<br>Lys15 0.1%<br>Glu16 0.5%<br>Phe17 0.1%<br>Lys18 1.1%<br>Arg19 0.1%<br>Ile20 0.1%<br>Gln22 0.7%<br>Arg23 1.3%<br>Ile24 0.1%<br>Lys25 0.9%<br>Asp26 0.8%<br>Phe27 0.8%<br>Leu28 0.4%<br>Arg29 0.6%<br>Asn30 0.9%<br>Leu31 0.7%<br>Leu32 0.6%<br>Pro33 0.2%<br>Arg34 1.4% | Gly3 0.3%<br>Phe6 0.2%<br>Arg7 0.3%<br>Lys8 0.1%<br>Ser9 0.1%<br>Lys10 0.5%<br>Lys12 0.5%<br>Phe17 0.3%<br>Lys18 1%<br>Gly14 0.1%<br>Arg19 0.1%<br>Ile20 0.2%<br>Gln22 0.1%<br>Arg23 1.4%<br>Lys25 1.3%<br>Asp26 0.1%<br>Arg29 0.2%<br>Arg30 0.9%<br>Pro33 0.1%<br>Arg34 1.4% |
| niacinamide + water       | Leu1 0.1%<br>Leu2 0.1%<br>Gly3 0.1%<br>Phe5 0.1%<br>Arg7 0.1%<br>Lys8 0.3%<br>Ser9 0.2%<br>Lys10 0.1%                                                              | Leu1 0.2 %<br>Leu2 0.3%<br>Asp4 0.2%<br>Phe5 0.5%<br>Phe6 0.6%<br>Ser9 0.2%<br>Lys10 0.4%<br>Glu11 0.7%                                                                                                                                                                                                                                                                                                      | Leu1 0.2%<br>Leu2 0.3%<br>Phe6 0.2%<br>Arg7 0.9%<br>Lys8 0.3%<br>Ser9 0.5%<br>Lys10 0.4%<br>Lys12 0.6%                                                                                                                                                                        |

|                                 |                                                                                                                                                                                                                              |                                                                                                                                                                                                                                                                                    |                                                                                                                                                                                                                                                        |
|---------------------------------|------------------------------------------------------------------------------------------------------------------------------------------------------------------------------------------------------------------------------|------------------------------------------------------------------------------------------------------------------------------------------------------------------------------------------------------------------------------------------------------------------------------------|--------------------------------------------------------------------------------------------------------------------------------------------------------------------------------------------------------------------------------------------------------|
|                                 | Lys12 0.3%<br>Lys15 0.1%<br>Phe17 0.2%<br>Lys18 0.2%<br>Arg19 0.3%<br>Ile20 0.1%<br>Gln22 0.2%<br>Arg23 0.5%<br>Ile24 0.1%<br>Lys25 0.1%<br>Leu28 0.2%<br>Arg29 0.3%<br>Asn30 0.2%<br>Leu31 0.1%<br>Val32 0.2%<br>Arg34 0.4% | Lys12 0.1%<br>Ile13 0.5%<br>Gly14 0.1%<br>Lys15 0.2%<br>Glu16 0.6%<br>Phe17 0.5%<br>Arg19 0.2%<br>Ile20 0.2%<br>Gln22 0.5%<br>Arg23 0.2%<br>Ile24 0.1%<br>Asp26 1%<br>Phe27 1.3%<br>Leu28 0.8%<br>Arg29 0.4%<br>Asn30 0.7%<br>Leu31 0.3%<br>Val32 0.4%<br>Pro33 0.2%<br>Arg34 0.5% | Ile13 0.2%<br>Lys15 0.4%<br>Lys18 0.8%<br>Arg19 1.6%<br>Ile20 0.1%<br>Ile24 0.1%<br>Lys15 1.2%<br>Val21 0.1%<br>Gln22 0.2%<br>Arg23 2.3%<br>Phe27 0.2%<br>Leu28 0.1%<br>Arg29 0.7%<br>Asn30 0.7%<br>Leu31 0.3%<br>Val32 0.4%<br>Pro33 0.3%<br>Arg34 1% |
| N-methylnicotinamide<br>+ water | Lys10 0.3%<br>Arg19 0.1%<br>Gln22 0.1%<br>Lys25 0.3%<br>Phe27 0.1%<br>Asn30 0.1%                                                                                                                                             | Leu1 0.1%<br>Leu2 0.3%<br>Gly3 0.1%<br>Phe6 0.1%<br>Ser9 0.1%<br>Lys10 0.7%<br>Glu16 0.2%<br>Arg19 1.3%<br>Arg23 0.2%<br>Lys25 0.1%<br>Asp26 0.1%<br>Phe27 0.3%<br>Leu28 0.6%<br>Arg29 0.1%<br>Asn30 0.6%<br>Pro33 0.1%<br>Arg34 0.3%                                              | Arg7 0.5%<br>Lys10 0.1%<br>Gly14 0.1%<br>Lys15 0.1%<br>Lys18 0.5%<br>Arg19 0.2%<br>Arg23 0.2%<br>Ile24 0.2%<br>Arg29 0.1%<br>Leu31 0.1%<br>Arg34 0.1%                                                                                                  |
| Isonicotinamide +<br>water      | Leu1 0.1%<br>Leu2 0.1%<br>Gly3 0.1%<br>Ser9 0.2%<br>Lys10 0.1%<br>Glu11 0.1%<br>Lys15 0.1%<br>Phe17 0.1%<br>Arg19 0.1%<br>Gln22 0.2%<br>Lys25 0.4%<br>Leu28 0.1%<br>Asn30 0.3%<br>Arg23 0.3%                                 | Leu1 0.2%<br>Leu2 0.2%<br>Asp4 0.3%<br>Phe5 0.3%<br>Phe6 0.7%<br>Arg7 0.1%<br>Lys8 0.1%<br>Ser9 0.2%<br>Lys10 0.2%<br>Glu11 0.2%<br>Ile13 0.2%<br>Glu16 0.3%<br>Phe17 0.1%<br>Lys18 0.2%                                                                                           | Leu1 0.2%<br>Gly3 0.2%<br>Phe5 0.1%<br>Phe6 0.1%<br>Arg7 0.8%<br>Lys8 0.2%<br>Ser9 0.5%<br>Lys10 0.3%<br>Glu11 0.2%<br>Lys12 0.3%<br>Ile13 0.2%<br>Gly14 0.1%<br>Lys15 0.3%<br>Lys18 0.3%                                                              |

|                                    |                                                                                                                                                                                                                                      |                                                                                                                                                                                                                                                                                                                                                                                              |                                                                                                                                                                                                                                                                                                                                      |
|------------------------------------|--------------------------------------------------------------------------------------------------------------------------------------------------------------------------------------------------------------------------------------|----------------------------------------------------------------------------------------------------------------------------------------------------------------------------------------------------------------------------------------------------------------------------------------------------------------------------------------------------------------------------------------------|--------------------------------------------------------------------------------------------------------------------------------------------------------------------------------------------------------------------------------------------------------------------------------------------------------------------------------------|
|                                    | Arg34 0.4%                                                                                                                                                                                                                           | Ile20 0.1%<br>Gln22 0.1%<br>Arg23 0.4%<br>Ile24 0.1%<br>Lys25 0.1%<br>Asp26 0.1%<br>Phe27 0.8%<br>Leu28 0.1%<br>Asn30 0.7%<br>Leu31 0.3%<br>Val32 0.4%<br>Arg34 0.1%                                                                                                                                                                                                                         | Arg19 0.8%<br>Ile20 0.1%<br>Val21 0.3%<br>Gln22 0.5%<br>Arg23 1.3%<br>Lys25 0.5%<br>Leu28 0.1%<br>Arg29 0.8%<br>Asn30 0.4%<br>Val32 0.1%<br>Arg34 0.6%                                                                                                                                                                               |
| Niacinamide +<br>methanol          | Leu1 0.1%<br>Leu2 0.1%<br>Gly3 0.1%<br>Phe5 0.2%<br>Arg7 0.3%<br>Ser9 0.6%<br>Lys10 0.3%<br>Lys12 0.5%<br>Lys15 0.5%<br>Lys18 0.4%<br>Arg19 0.4%<br>Gln22 0.3%<br>Arg23 0.5%<br>Lys25 0.3%<br>Arg29 0.1%<br>Asn30 0.1%<br>Arg34 0.2% | Leu1 0.1%<br>Leu2 0.1%<br>Gly3 0.1%<br>Asp4 0.8%<br>Phe5 0.2%<br>Lys8 0.4%<br>Ser9 0.2%<br>Lys10 0.5%<br>Glu11 2.2%<br>Ile13 0.1%<br>Gly14 0.1%<br>Lys15 0.3%<br>Glu16 0.5%<br>Phe17 0.2%<br>Lys18 0.1%<br>Arg19 0.2%<br>Val21 0.1%<br>Gln 22 2.5%<br>Arg23 0.4%<br>Asp26 1.3%<br>Phe27 0.9%<br>Leu28 0.1%<br>Arg29 0.4%<br>Asn30 1.1%<br>Leu31 0.1%<br>Val32 0.5%<br>Pro33 1%<br>Arg34 1.2% | Leu1 4.3%<br>Leu2 0.9%<br>Gly3 0.9%<br>Asp4 0.2%<br>Phe5 0.1%<br>Arg7 4.1%<br>Lys8 2.8%<br>Ser9 0.6%<br>Lys10 3.7%<br>Glu11 0.2%<br>Lys12 3.3%<br>Ile13 0.1%<br>Lys15 4.4%<br>Lys18 2.4%<br>Arg19 4.7%<br>Gln22 1.2%<br>Arg23 4.7%<br>Ile24 0.1%<br>Lys25 2.7%<br>Phe27 0.1%<br>Arg29 2.9%<br>Asn30 1.3%<br>Val32 0.1%<br>Arg34 4.5% |
| N-methylnicotinamide<br>+ methanol | Leu1 0.4%<br>Leu2 0.1%<br>Arg7 0.5%<br>Lys8 0.2%<br>Ser9 0.3%<br>Lys10 0.4%<br>Lys12 0.3%<br>Lys15 0.2%<br>Phe17 0.1%<br>Lys18 0.3%<br>Arg19 0.4%<br>Gln22 0.4%                                                                      | Asp4 0.3%<br>Glu16 0.2%<br>Gln22 0.3%<br>Lys25 0.1%<br>Asp26 1.8%<br>Phe27 0.4%<br>Arg29 0.2%<br>Asn30 0.6%<br>Leu31 0.3%<br>Val32 0.1%<br>Arg34 0.8%                                                                                                                                                                                                                                        | Leu1 1.1%<br>Leu2 0.3%<br>Gly3 0.2%<br>Phe6 0.2%<br>Arg7 2%<br>Lys8 1.1%<br>Ser9 0.1%<br>Lys10 0.9%<br>Lys12 1.7%<br>Lys15 1.2%<br>Lys18 0.8%<br>Arg19 2%                                                                                                                                                                            |

|                               |                                                                                                                                                                                                                                                                   |                                                                                                                                                                                                                                                                                                                                                      |                                                                                                                                                                                                                                                                                             |
|-------------------------------|-------------------------------------------------------------------------------------------------------------------------------------------------------------------------------------------------------------------------------------------------------------------|------------------------------------------------------------------------------------------------------------------------------------------------------------------------------------------------------------------------------------------------------------------------------------------------------------------------------------------------------|---------------------------------------------------------------------------------------------------------------------------------------------------------------------------------------------------------------------------------------------------------------------------------------------|
|                               | Arg23 0.7%<br>Lys25 0.1%<br>Arg29 0.3%<br>Asn30 0.5%<br>Arg34 0.9%                                                                                                                                                                                                |                                                                                                                                                                                                                                                                                                                                                      | Gln22 0.8%<br>Arg23 2.8%<br>Lys25 0.8%<br>Arg29 1.4%<br>Asn30 0.5%<br>Pro33 0.1%<br>Arg34 1.9%                                                                                                                                                                                              |
| Isonicotinamide +<br>methanol | Gly3 0.1%<br>Phe5 0.1%<br>Arg7 0.1%<br>Lys8 0.1%<br>Ser9 0.2%<br>Lys10 0.3%<br>Lys15 0.2%<br>Lys18 0.1%<br>Gln22 0.3%<br>Arg23 0.2%<br>Lys25 0.2%<br>Arg29 0.3%<br>Asn30 0.3%<br>Arg34 0.4%                                                                       | Leu1 0.2%<br>Leu2 0.1%<br>Gly3 0.2%<br>Asp4 0.6%<br>Arg7 0.1%<br>Ser9 0.4%<br>Lys10 0.4%<br>Glu11 0.8%<br>Lys12 0.1%<br>Gly14 0.1%<br>Lys15 0.2%<br>Glu16 0.7%<br>Phe17 0.1%<br>Gln22 0.2%<br>Arg23 0.1%<br>Lys25 0.2%<br>Asp26 0.9%<br>Phe27 0.2%<br>Leu28 0.1%<br>Arg29 0.5%<br>Asn30 0.3%<br>Leu31 0.7%<br>Val32 0.5%<br>Pro33 0.3%<br>Arg34 0.9% | Leu1 1.4%<br>Leu2 0.5%<br>Gly3 0.4%<br>Phe5 0.5%<br>Arg7 1.4%<br>Lys8 1.6%<br>Ser9 0.3%<br>Lys10 3.1%<br>Lys12 0.7%<br>Lys15 0.8%<br>Lys18 1.5%<br>Arg19 2.1%<br>Gln22 0.4%<br>Arg23 3.1%<br>Lys25 1.1%<br>Phe27 0.2%<br>Leu28 0.1%<br>Arg29 1.4%<br>Asn30 0.7%<br>Pro33 0.1%<br>Arg34 1.8% |
| Niacinamide + octanol         | Leu1 0.2%<br>Leu2 0.4%<br>Phe5 0.1%<br>Arg7 1.3%<br>Lys8 9.3%<br>Ser9 6.3%<br>Lys10 1%<br>Lys12 8.6%<br>Ile13 0.1%<br>Lys15 31.3%<br>Phe17 0.1%<br>Lys18 53.6%<br>Arg19 2.8%<br>Ile20 0.6%<br>Val21 0.6%<br>Gln22 21.7%<br>Arg23 0.9%<br>Ile24 0.4%<br>Lys25 2.1% | Leu1 1.6%<br>Asp4 5.5%<br>Phe5 1.1%<br>Lys8 3.4%<br>Ser9 0.5%<br>Lys10 0.1%<br>Glu11 16.8%<br>Lys12 0.2%<br>Ile13 0.2%<br>Lys15 0.1%<br>Glu16 12.7%<br>Phe17 0.7%<br>Arg19 2.1%<br>Ile20 0.4%<br>Val21 0.1%<br>Gln22 49%<br>Ile24 0.2%<br>Lys25 0.5%<br>Asp26 5.1%                                                                                   | Leu1 22.9%<br>Leu2 9.6%<br>Gly3 3.6%<br>Asp4 1%<br>Phe5 0.2%<br>Phe6 0.4%<br>Arg7 25.6%<br>Lys8 41.5%<br>Ser9 4.8%<br>Lys10 41%<br>Lys12 87.8%<br>Ile13 0.2%<br>Lys15 51.9%<br>Glu16 0.2%<br>Lys18 53.1%<br>Arg19 74.6%<br>Ile20 0.7%<br>Val21 0.4%<br>Gln22 16%                            |

|                                   |                                                                                                                                                                                                                                                                                               |                                                                                                                                                                                                                     |                                                                                                                                                                                                                                                                                                                                                           |
|-----------------------------------|-----------------------------------------------------------------------------------------------------------------------------------------------------------------------------------------------------------------------------------------------------------------------------------------------|---------------------------------------------------------------------------------------------------------------------------------------------------------------------------------------------------------------------|-----------------------------------------------------------------------------------------------------------------------------------------------------------------------------------------------------------------------------------------------------------------------------------------------------------------------------------------------------------|
|                                   | Arg29 1.9%<br>Asn30 0.7%<br>Leu31 0.1%<br>Val32 0.7%<br>Arg34 0.3%                                                                                                                                                                                                                            | Phe27 1.7%<br>Leu28 0.6%<br>Arg29 10.1%<br>Asn30 13.1%<br>Leu31 0.1%<br>Val32 33.3%<br>Pro33 2.5%<br>Arg34 7.4%                                                                                                     | Arg23 47.1%<br>Lys25 54.1%<br>Phe27 1%<br>Leu28 0.3%<br>Arg29 31.6%<br>Asn30 13.3%<br>Leu31 0.6%<br>Val32 1.70%<br>Arg34 10.4%                                                                                                                                                                                                                            |
| N-methylnicotinamide<br>+ octanol | Leu1 4.9%<br>Leu2 2.3%<br>Gly3 3.1%<br>Asp4 0.1%<br>Phe5 0.2%<br>Phe6 0.1%<br>Arg7 11.9%<br>Lys8 2.2%<br>Ser9 22.5%<br>Lys10 1.6%<br>Lys12 3.9%<br>Lys15 11.50%<br>Lys18 2.2%<br>Arg19 1.2%<br>Gln22 6.2%<br>Arg23 1.3%<br>Lys25 2.7%<br>Asn30 0.4%<br>Leu31 0.3%<br>Val32 1.7%<br>Arg34 0.4% | Gln22 3%<br>Asp26 0.1%<br>Leu28 2.5%<br>Arg29 1.9%<br>Asn30 0.7%<br>Leu31 8.8%<br>Val32 0.4%<br>Pro33 0.1%<br>Arg34 3.2%                                                                                            | Leu1 15.8%<br>Leu2 9.9%<br>Gly3 12.8%<br>Phe5 0.1%<br>Phe6 0.3%<br>Arg7 19.1%<br>Lys8 71.3%<br>Ser9 16.6%<br>Lys10 11%<br>Lys12 97.1%<br>Ile13 0.1%<br>Lys15 18.4%<br>Lys18 15.5%<br>Arg19 25.9%<br>Val21 0.1%<br>Gln22 4.5%<br>Arg23 4.7%<br>Lys25 30.8%<br>Phe27 0.1%<br>Leu28 0.2%<br>Asn30 2%<br>Leu31 0.3%<br>Val32 2.8%<br>Pro33 0.3%<br>Arg34 9.1% |
| Isonicotinamide +<br>octanol      | Leu1 0.2%<br>Phe5 0.1%<br>Phe6 0.2%<br>Arg7 1.2%<br>Ser9 1.1%<br>Lys10 0.7%<br>Lys12 0.4%<br>Lys18 0.4%<br>Arg19 0.5%<br>Gln22 4.5%<br>Arg23 0.4%<br>Lys25 1.2%<br>Arg29 0.1%<br>Asn30 1.3%<br>Pro33 0.1%<br>Arg34 0.5%                                                                       | Leu1 0.6%<br>Asp4 1.6%<br>Phe5 0.1%<br>Phe6 0.2%<br>Ser9 1%<br>Glu11 0.8%<br>Glu16 1%<br>Arg19 0.3%<br>Ile20 0.2%<br>Val21 0.2%<br>Gln22 1.7%<br>Arg23 0.2%<br>Lys25 0.2%<br>Asp26 2.1%<br>Phe27 0.1%<br>Arg29 3.1% | Leu1: 40%<br>Leu2: 2.8%<br>Gly3: 17.2%<br>Asp4: 0.5%<br>Phe5: 0.1%<br>Arg7: 11%<br>Lys8: 11%<br>Ser9: 4.3%<br>Lys10:34.7%<br>Lys12: 12.3%<br>Lys15:13.9%<br>Glu16:0.1%<br>Phe17:0.1%<br>Lys18:21.1%<br>Arg19:30.4%<br>Val21:0.1%                                                                                                                          |

|  |  |                                                                     |                                                                                                                |
|--|--|---------------------------------------------------------------------|----------------------------------------------------------------------------------------------------------------|
|  |  | Asn30 5.2%<br>Leu31 0.4%<br>Val32 2.1%<br>Pro33 4.6%<br>Arg34 25.7% | Gln22:23.6%<br>Arg23:6.3%<br>Lys25:14.9%<br>Asp26:0.3%<br>Phe27:0.1%<br>Arg29:12%<br>Asn30:4.9%<br>Arg34:15.4% |
|--|--|---------------------------------------------------------------------|----------------------------------------------------------------------------------------------------------------|
